# Supplementary material for: Systemic above- and belowground cross talk: hormone-based responses triggered by Heterodera schachtii and shoot herbivores in Arabidopsis thaliana
Source: PubMed Central journal article supplement (PMC4765779; doi:10.1093/jxb/erv398), 2015-08-31
Supplement: supp_erv398_jexbot153130_file001.pdf [file supp_erv398_jexbot153130_file001.pdf]

## Supplementary Tables

**Supplementary Table 1.** Primers for hormone- and defence marker genes used in qRT-PCR analysis

| Gene           | Acc. number | Primer sequence                                               |
|----------------|-------------|---------------------------------------------------------------|
| <i>HEL</i>     | At3g04720   | F: GATAAGCCGTACGCATGGC<br>R: TCACCCTTAAACACTTGCCG             |
| <i>PDF1.2</i>  | At5g44420   | F: TGTTCTCTTTGCTGCTTTG<br>R: TTTCCGCAAACCCCTGAC               |
| <i>PR5</i>     | At1g75040   | F: AGGCTGCAACTTTGACGC<br>R: AGAAATCTTTGCCGCCATC               |
| <i>UBP22</i>   | At5g10790   | F: ACAACATATGACCCGTTTATCGA<br>R: TGTTTAGGCGGAACGGATACT        |
| <i>18S RNA</i> |             | F: TGACACGGGGAGGTAGTGACA<br>R: AGTCTGGTAATTGGAATGAGTACAATCTAA |
| <i>JAR1</i>    | At2g46370   | F: GCTACATTTGCTGTGATTCCG<br>R: GGTATCGATACAACCCTGCG           |
| <i>NPR1</i>    | At1g64280   | F: GAGTTGCACTTGCTCAACGTC<br>R: GCTATCTTTACACCCGGTGATG         |
| <i>EIN2</i>    | At5g03280   | F: CCTTGTCATAATGGAGCAGG<br>R: CACGATGAAGCCAAGCG               |

**Supplementary Table 2.** Validation of *18S rRNA* and *UBP22* for their suitability as reference genes for qRT-PCR analysis. Ct-values obtained for infected vs. non-infected *A. thaliana* tissue. i=infected, ni=non-infected

**H. schachtii - shoot**

|                 | Mean Ct | SE       | p-value |
|-----------------|---------|----------|---------|
| <b>18S i</b>    | 14.37   | +/- 0.03 |         |
| <b>18S ni</b>   | 14.57   | +/- 0.10 | 0.1986  |
| <b>UBP22 i</b>  | 26.79   | +/- 0.21 |         |
| <b>UBP22 ni</b> | 26.95   | +/- 0.15 | 0.5655  |

**F. occidentalis - root**

|                 | Mean Ct | SE       | p-value |
|-----------------|---------|----------|---------|
| <b>18S i</b>    | 14.53   | +/- 0.08 |         |
| <b>18S ni</b>   | 14.53   | +/- 0.03 | 0.9450  |
| <b>UBP22 i</b>  | 28.73   | +/- 0.38 |         |
| <b>UBP22 ni</b> | 29.19   | +/- 0.37 | 0.4300  |

**T. urticae - root**

|                 | Mean Ct | SE       | p-value |
|-----------------|---------|----------|---------|
| <b>18S i</b>    | 14.578  | +/- 0.07 |         |
| <b>18S ni</b>   | 14.5343 | +/- 0.03 | 0.6337  |
| <b>UBP22 i</b>  | 29.54   | +/- 0.37 |         |
| <b>UBP22 ni</b> | 29.20   | +/- 0.37 | 0.5479  |

**Supplementary Table 3.** Hormone quantification of shoots of *A. thaliana* plants infected with *H. schachtii* in comparison to shoots of non-infected control plants; ABA =abscisic acid, DPA=dihydrophaseic acid, PA=phaseic acid, ABA-GE=abscisic acid glucosyl ester, NeoPA= neophaseic acid, IAA=indole-3-acetic acid, IAA-Asp=indole-3-acetyl-aspartate, OxIAA=2-oxindole-3-acetate, PAA=2-phenylacetic acid, IPya= indole-3-pyruvic acid, IAN= indole-3-acetonitrile, SA=salicylic acid, JA=jasmonic acid, JA-Ileu=jasmonic acid isoleucine, cis-OPDA=12-oxophytodienoic acid, GA=gibberellin, CK=cytokinins, act-CKs=active cytokinins (*trans*-zeatin, dihydrozeatin, isopentenyladenine, *cis*-zeatin and the corresponding ribosides), CK N-glc=cytokinin N-glucosides, CK O-glc=cytokinin O-glucosides,CK P=cytokinin precursors, cZ der= derivatives of *cis*-zeatin, ACC=1-aminocyclopropane-1-carboxylic acid

|                  | inf.     |         | non-inf. |         | statistics |
|------------------|----------|---------|----------|---------|------------|
|                  | MW       | SE      | MW       | SE      | p-value    |
| ABA              | 5.04     | 0.30    | 5.78     | 0.69    | 0.3639     |
| DPA              | 4.55     | 0.47    | 1.73     | 0.27    | 0.0020     |
| PA               | 2.54     | 0.27    | 2.02     | 0.27    | 0.2247     |
| ABA-GE           | 15.54    | 1.56    | 13.04    | 1.51    | 0.2933     |
| NeoPA            | 0.11     | 0.02    | 0.14     | 0.08    | 0.7259     |
| IAA              | 21.83    | 0.87    | 18.39    | 0.59    | 0.0171     |
| IAA-Asp          | 13.57    | 1.69    | 11.67    | 0.60    | 0.3306     |
| OxIAA            | 235.55   | 19.99   | 218.88   | 20.10   | 0.5780     |
| PAA              | 268.36   | 31.28   | 237.26   | 21.12   | 0.4415     |
| IPyA             | 32.12    | 3.77    | 17.69    | 3.15    | 0.0260     |
| IAN              | 896.41   | 28.63   | 775.06   | 73.50   | 0.1748     |
| SA               | 690.39   | 28.87   | 405.46   | 84.18   | 0.0186     |
| JA               | 34.54    | 1.58    | 13.22    | 1.61    | 0.0001     |
| JA-Ileu          | 0.18     | 0.09    | 0.09     | 0.02    | 0.3559     |
| cisOPDA          | 1206.91  | 326.06  | 867.88   | 40.06   | 0.3419     |
| GA <sub>4</sub>  | 3.01     | 0.56    | 1.91     | 0.17    | 0.1106     |
| GA <sub>8</sub>  | 0.80     | 0.21    | 0.81     | 0.18    | 0.9803     |
| GA <sub>19</sub> | 4.49     | 0.56    | 4.98     | 0.39    | 0.4992     |
| act CK           | 7.01     | 0.26    | 7.72     | 0.28    | 0.1132     |
| CK N-glc         | 53.78    | 3.42    | 55.46    | 1.71    | 0.6767     |
| CK O-glc         | 3.95     | 0.27    | 3.46     | 0.40    | 0.3459     |
| CK P             | 8.23     | 0.25    | 8.32     | 0.24    | 0.8167     |
| cZ der           | 6.60     | 0.40    | 7.59     | 0.16    | 0.0617     |
| ACC              | 47725.97 | 3222.76 | 42652.97 | 5933.27 | 0.4809     |

**Supplementary Table 4.** Hormone quantification of roots of *A. thaliana* plants infested with *F. occidentalis* and *T. urticae* in comparison to roots of non-infested control plants; ABA=abscisic acid, DPA=dihydrophaseic acid, PA=phaseic acid, IAA=Indole-3-acetic acid, IAN= indole-3-acetonitrile, SA=salicylic acid, JA=jasmonic acid, JA-Ileu=jasmonic acid isoleucine, cis-OPDA=12-oxophytodienoic acid, GA=gibberellin, ACC=1-aminocyclopropane-1-carboxylic acid

| <b>THRIPS ROOTs</b> | <b>infested</b> | <b>control</b> | <b>p-value</b> |
|---------------------|-----------------|----------------|----------------|
| ABA                 | 2.72            | 3.10           | 0.4798         |
| DPA                 | 20.24           | 11.18          | 0.0160         |
| PA                  | 0.81            | 0.89           | 0.8164         |
| IAA                 | 25.19           | 34.84          | 0.0052         |
| IAN                 | 474.25          | 1226.25        | 0.0000         |
| SA                  | 256.76          | 186.09         | 0.0897         |
| JA                  | 6.48            | 3.54           | 0.0005         |
| JA-Ileu             | 0.70            | 0.14           | 0.0186         |
| cisOPDA             | 350.39          | 276.26         | 0.0838         |
| GA <sub>4</sub>     | 0.20            | 0.32           | 0.4869         |
| GA <sub>8</sub>     | 0.78            | 1.15           | 0.1950         |
| GA <sub>19</sub>    | 2.79            | 1.04           | 0.0202         |
| act CK              | 3.72            | 3.41           | 0.2777         |
| ACC                 | 5490.72         | 5603.34        | 0.9173         |

  

| <b>MITE ROOTs</b> | <b>infested</b> | <b>control</b> | <b>p-value</b> |
|-------------------|-----------------|----------------|----------------|
| ABA               | 4.30            | 2.59           | 0.0001         |
| DPA               | 26.48           | 15.28          | 0.0007         |
| PA                | 0.87            | 0.64           | 0.2729         |
| IAA               | 52.68           | 39.28          | 0.0043         |
| IAN               | 1052.06         | 722.23         | 0.0450         |
| SA                | 305.36          | 257.00         | 0.0882         |
| JA                | 8.56            | 6.78           | 0.0377         |
| JA-Ileu           | 0.45            | 0.25           | 0.5134         |
| cisOPDA           | 500.63          | 368.46         | 0.0096         |
| GA <sub>4</sub>   | 0.70            | 0.35           | 0.1379         |
| GA <sub>8</sub>   | 1.23            | 0.67           | 0.1548         |
| GA <sub>19</sub>  | 2.27            | 2.15           | 0.8523         |
| act CK            | 3.10            | 2.48           | 0.1037         |
| ACC               | 4528.48         | 3006.43        | 0.0516         |
